# Supplementary material for: The competition between dehydrogenation and dehydration reactions for primary and secondary alcohols over gallia: unravelling the effects of molecular and electronic structure via a two-pronged theoretical/experimental approach
Source: Royal Society of Chemistry journal article supplement (doi:10.1039/c9cy02603g), 2020-01-01
Supplement: c9cy02603g1.pdf [file c9cy02603g1.pdf]

## SUPPLEMENTARY

### The competition between dehydrogenation and dehydration reactions for primary and secondary alcohols over gallia: unravelling the effects of molecular and electronic structure via a two-pronged theoretical/experimental approach

Lorella Izzo<sup>a</sup>, Tommaso Tabanelli<sup>b</sup>, Fabrizio Cavani<sup>b,c</sup>, Paola Blair Vàsquez<sup>b</sup>, Carlo Lucarelli<sup>d\*</sup>,  
Massimo Mella<sup>d\*</sup>

<sup>a</sup>Dipartimento di Biotecnologia e Scienze della Vita, Università degli Studi dell'Insubria, via J. H. Dunant 3, 21100 Varese (I)

<sup>b</sup>Dipartimento di Chimica Industriale "Toso Montanari", Università degli Studi di Bologna, Viale Risorgimento 4, 40136 Bologna (I)

<sup>c</sup>Consorzio INSTM, Research Unit of Bologna, Florence

<sup>d</sup>Dipartimento di Scienza ed Alta Tecnologia, Università degli Studi dell'Insubria, via Valleggio 11, 22100 Como (I)

#### Material characterization

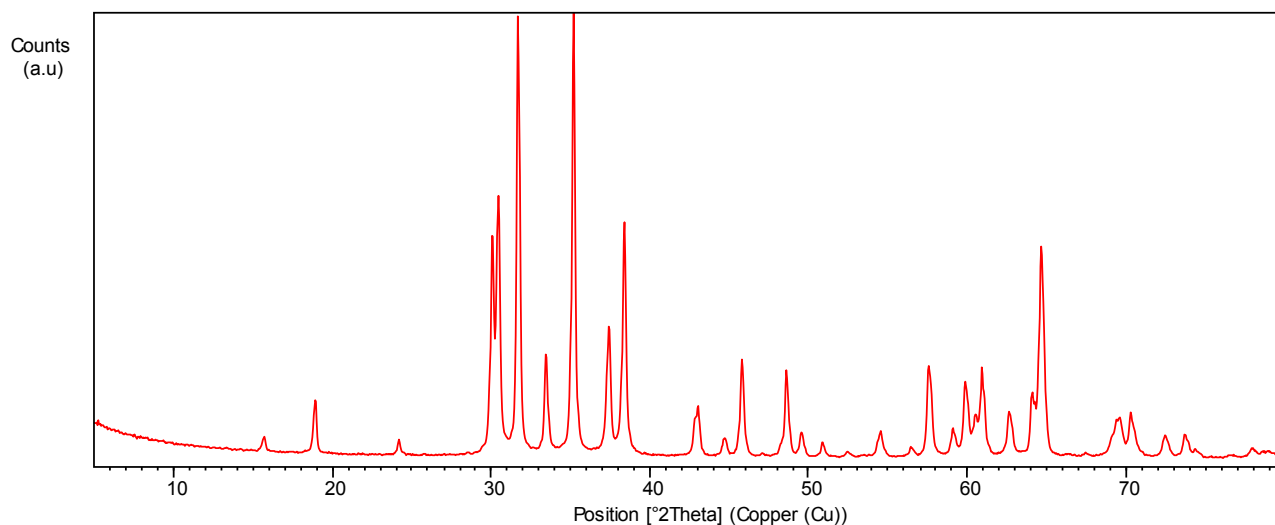

**Figure S1:** PXRD of commercial gallia; pure monoclinic phase (00-041-1103).

The catalyst has been further characterized by means of N<sub>2</sub> physisorption for the determination of the specific surface area (SSA) using the BET equation. The SSA of the commercial gallium oxide is equal to 7 m<sup>2</sup>/g. Moreover, in order to have better insight on the acid and basic sites of the catalyst, both ammonia and carbon dioxide temperature programmed desorption (NH<sub>3</sub>-TPD and CO<sub>2</sub>-TPD respectively) have been performed on the fresh catalyst. The catalytic results are shown in Table S1 and in Figure S2.

| μmol/g NH <sub>3</sub> | μmol/m <sup>2</sup> NH <sub>3</sub> | μmol/g CO <sub>2</sub> | μmol/m <sup>2</sup> CO <sub>2</sub> |
|------------------------|-------------------------------------|------------------------|-------------------------------------|
| 43.7                   | 6.2                                 | 21.8                   | 3.1                                 |

Table S1: quantification of the acid and basic sites of the Ga<sub>2</sub>O<sub>3</sub> catalyst.

$\text{Ga}_2\text{O}_3$  shows only weak basic sites on the catalyst surface; in fact, only a very small peak can be detected around 110°C during  $\text{CO}_2$ -TPD. On the other hand,  $\text{NH}_3$ -TPD shows the desorption of a considerable amount of ammonia in a wide range of temperature (from 130°C to 500°C) as reported in Figure S2. We take this as an indirect proof of the presence of different acid sites (from weak to medium strength). Moreover, both the erosion of the  $\text{GaO-H}$  stretching and the concomitant growth of the bands attributable to the dehydration products highlighted in the DRIFT experiments are clear indicators of the presence of Bronsted acid sites.

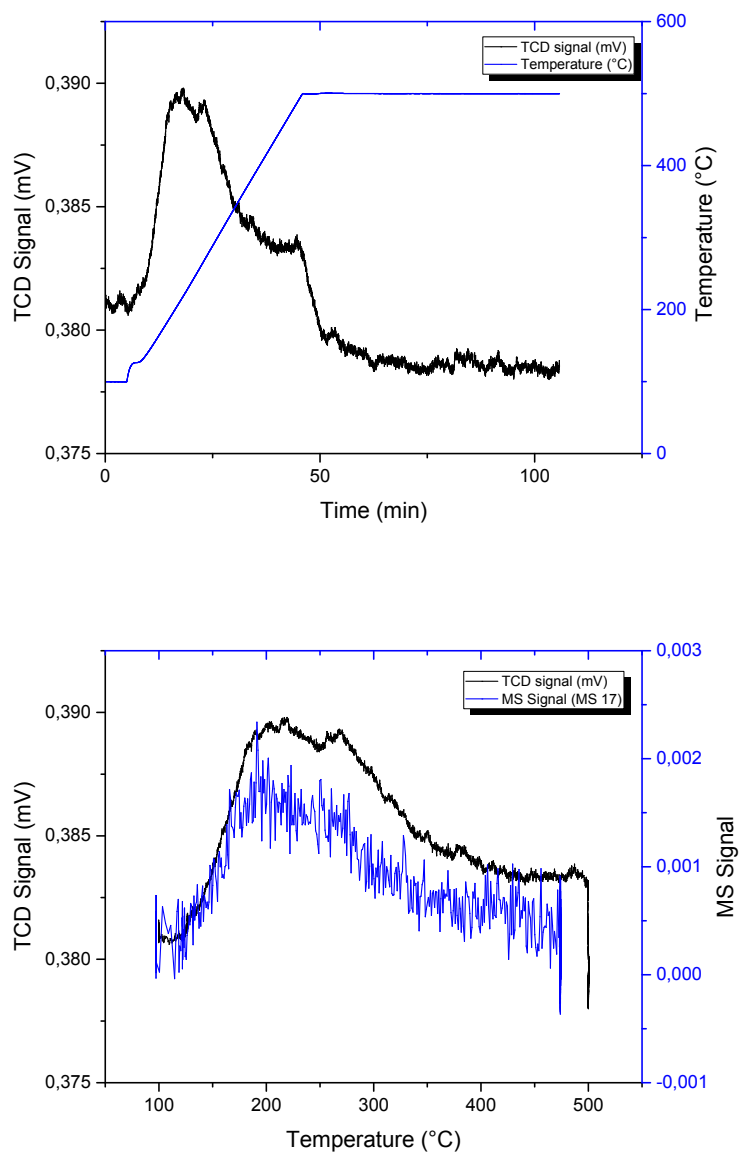

Figure S2:  $\text{NH}_3$ -TPD profiles for the  $\text{Ga}_2\text{O}_3$

### Regime testing for the studied processes

Thus, let us begin by pointing out that the presence of internal diffusional limitation can be safely assumed negligible given the specific surface area of the commercial gallia ( $7 \text{ m}^2/\text{g}$ ). We instead opted to run an additional dedicated experiment in order to understand whether or not we are in the presence of external diffusional limitation. Specifically, the reactor was loaded with half the amount (0.5g) of the catalytic material normally used and by halving the inlet flow rate to keep the contact time constant at the same reaction temperature; doubling the flow rate and catalyst mass was instead hampered by the presence of an excessive pressure drop. In these conditions, we analysed the transformation induced by the catalyst on ethanol, which was previously shown not to reach total conversion. The results in terms of alcohol conversion and product distribution (Figure S3) agree with the ones reported in the main text and obtained loading 1 g of  $\text{Ga}_2\text{O}_3$ . This proved that the reaction is under a kinetic regime and that the external diffusion is not limiting our reactions.

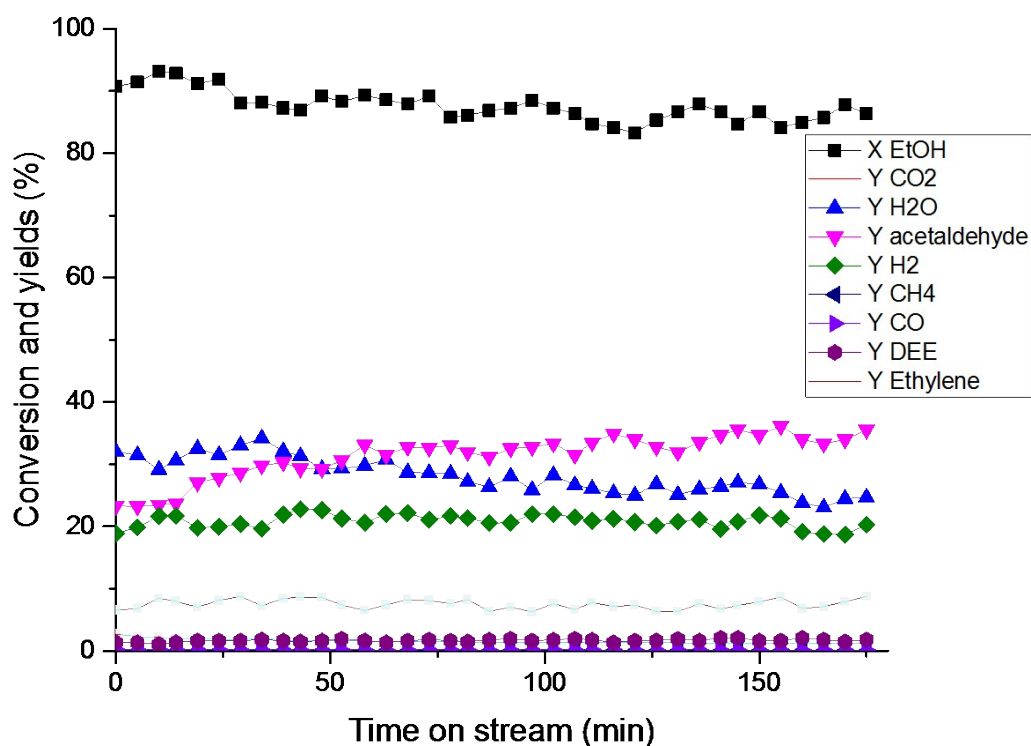

Figure S3: ethanol decomposition over  $\text{Ga}_2\text{O}_3$  at  $400^\circ\text{C}$ ,  $\tau=1\text{s}$ , (molar feed composition benzyl alcohol: $\text{N}_2=8:92$ ). Catalyst loaded: 0.5g.

**Table S2:** Vibrational assignment ( $\text{cm}^{-1}$ ) for 1-propanol over  $\text{Ga}_2\text{O}_3$ . The labels pre-deH<sub>2</sub> and post-deH<sub>2</sub>O indicate the local minimum before the dehydrogenation TS, and the kinetic product of the dehydration (see Figure 1 for the reaction profile).

| Description                                                                                                     | Wavenumber ( $\text{cm}^{-1}$ ) |                      |                         |              |      |      |       |
|-----------------------------------------------------------------------------------------------------------------|---------------------------------|----------------------|-------------------------|--------------|------|------|-------|
|                                                                                                                 | Calculated                      |                      |                         | Experimental |      |      |       |
|                                                                                                                 | free                            | Pre-deH <sub>2</sub> | Post-deH <sub>2</sub> O | free         | Ads. | Des. | Flow  |
| <b><math>\nu</math> OH free <math>\text{Ga}_2\text{O}_3</math></b>                                              | -                               | -                    | -                       | <b>3658</b>  | -    | -    | -     |
| $\nu$ OH                                                                                                        | 3750                            | -                    | -                       | 3320         | -    | -    | -     |
| $\nu$ GaO—H                                                                                                     | -                               | -                    | 3862                    | -            | -    | 3458 | 3463  |
| $\nu$ Ga-(O—H)-C                                                                                                | -                               | -                    | 3837                    | -            | 3323 | -    | -     |
| $\nu$ -CO—H--OGa                                                                                                | -                               | 2984                 | -                       | -            | -    | 3249 | 3264  |
| $\nu_{\text{as}}$ CH <sub>3</sub> + $\nu_{\text{as}}$ CH <sub>2</sub> (propanal/propanoate)                     | -                               | -                    | 3146                    | -            | -    | 2984 | 2986  |
| $\nu_{\text{s}}$ CH <sub>3</sub>                                                                                | 3125                            | 3130                 | -                       | 2962         | 2966 | -    | 2966  |
| $\nu_{\text{as}}$ CH <sub>3</sub> + $\nu_{\text{as}}$ CH <sub>2</sub> (propanoate)                              | -                               | -                    | 3112                    | -            | -    | 2945 | -     |
| $\nu_{\text{as}}$ CH <sub>2</sub> + $\nu_{\text{as}}$ CH <sub>3</sub>                                           | 3085                            | 3114                 | -                       | 2935         | 2939 | -    | 2939  |
| $\nu_{\text{s}}$ of CH <sub>2</sub> + $\nu_{\text{s}}$ CH <sub>3</sub>                                          | 3047                            | 3052                 | -                       | 2925         | 2922 | -    | 2918  |
| $\nu_{\text{s}}$ CH <sub>2</sub> + $\nu$ CH (propanoate)                                                        | -                               | -                    | 3094                    | -            | -    | 2885 | -     |
| $\nu_{\text{s}}$ if CH <sub>2</sub> + $\nu_{\text{s}}$ CH <sub>3</sub> + $\nu$ OH                               | 3040                            | 3048                 | -                       | 2875         | 2880 | -    | 2880  |
| $\nu_{\text{s}}$ CH <sub>3</sub> + $\nu_{\text{s}}$ CH <sub>2</sub> (propanal)                                  | -                               | -                    | 2998                    | -            | -    | -    | 2730  |
| -                                                                                                               | -                               | -                    | -                       | -            | -    | -    | 1759  |
| $\nu$ -C—O--Ga (propanal)                                                                                       | -                               | -                    | 1722                    | -            | -    | -    | 1733  |
| (propanal)                                                                                                      | -                               | -                    | -                       | -            | -    | 1708 | 1701  |
| $\nu$ C=C + $\delta_{\text{s}}$ CH <sub>2</sub> + $\delta_{\text{s}}$ CH <sub>3</sub> + $\delta$ CH (propylene) | -                               | -                    | 1635                    | -            | -    | 1648 | 1650  |
| $\nu_{\text{as}}$ -COO--Ga (propanoate)                                                                         | -                               | -                    | 1509                    | -            | -    | 1541 | 1540  |
| $\delta_{\text{s}}$ CH <sub>3</sub> + $\delta_{\text{s}}$ CH <sub>2</sub> + $\delta$ CH (propanal)              | -                               | -                    | 1449                    | -            | -    | 1472 | 1472  |
| $\delta_{\text{s}}$ CH <sub>3</sub> + $\delta_{\text{s}}$ CH <sub>2</sub> + $\delta$ OH <sub>ip</sub>           | 1502                            | 1510                 | -                       | 1456         | 1464 | -    | -     |
| $\nu_{\text{s}}$ -COO--Ga (propanoate)                                                                          | -                               | -                    | 1430                    | -            | -    | 1436 | 1430  |
| $\delta$ OH <sub>ip</sub> + $\omega$ CH <sub>2of</sub> + $\delta_{\text{s}}$ CH <sub>3</sub>                    | 1420                            | 1434                 | -                       | 1382         | 1415 | -    | -     |
| $\delta$ OH <sub>ip</sub> + $\omega$ CH <sub>2if</sub> + $\delta_{\text{s}}$ CH <sub>3</sub>                    | 1316                            | 1401                 | -                       | 1345         | 1389 | -    | 1387  |
| $\delta$ CH + $\delta$ CO + $\omega$ CH <sub>2</sub> + $\delta_{\text{s}}$ CH <sub>3</sub> + (propanal)         | -                               | -                    | 1407                    | -            | -    | -    | 1378  |
| $\delta$ CH + $\omega$ CH <sub>2</sub> + $\delta_{\text{s}}$ CH <sub>3</sub> + (propanal)                       | -                               | -                    | 1333                    | -            | -    | -    | 1339  |
| $\tau$ CH <sub>2</sub> + $\tau$ CH <sub>3</sub> + $\delta$ CH (propanal)                                        | -                               | -                    | 1267                    | -            | -    | 1301 | 1300  |
| $\omega$ CC + $\rho$ CH <sub>3</sub> + $\omega$ CH <sub>2</sub> (propanal)                                      | -                               | -                    | 1184                    | -            | -    | -    | 1258  |
| $\tau$ CH <sub>2</sub> + $\tau$ CH <sub>2</sub> + $\delta$ OH <sub>ip</sub>                                     | 1280                            | 1309                 | -                       | 1239         | 1340 | -    | -     |
| $\nu$ CC + $\omega$ CH <sub>2</sub> + $\rho$ CH <sub>3</sub> (propanal)                                         | -                               | -                    | 1031                    | -            | -    | -    | 1231- |
| $\tau$ CH <sub>2</sub> + $\omega$ CH <sub>3</sub> + $\delta$ OH <sub>op</sub>                                   | 1143                            | 1166                 | -                       | 1097         | 1100 | -    | -     |
| $\tau$ CH <sub>2</sub> (OH) + $\omega$ CH <sub>2</sub> + $\nu$ C-OH                                             | 1093                            | 1138                 | -                       | 1066         | 1069 | -    | 1062  |
| $\rho$ CH <sub>3</sub> + $\rho$ CH <sub>2</sub> + $\delta$ OH <sub>op</sub> + $\nu$ CC                          | 1054                            | 1095                 | -                       | 1056         | 1055 | -    | -     |
| $\tau$ CH <sub>3</sub> + $\tau$ CH <sub>2</sub>                                                                 | 939                             | 1048                 | -                       | 1016         | 1017 | -    | -     |
| $\nu$ CC + $\delta$ OH <sub>op</sub> + $\tau$ HOCO                                                              | 898                             | 998                  | -                       | 966          | 971  | -    | -     |

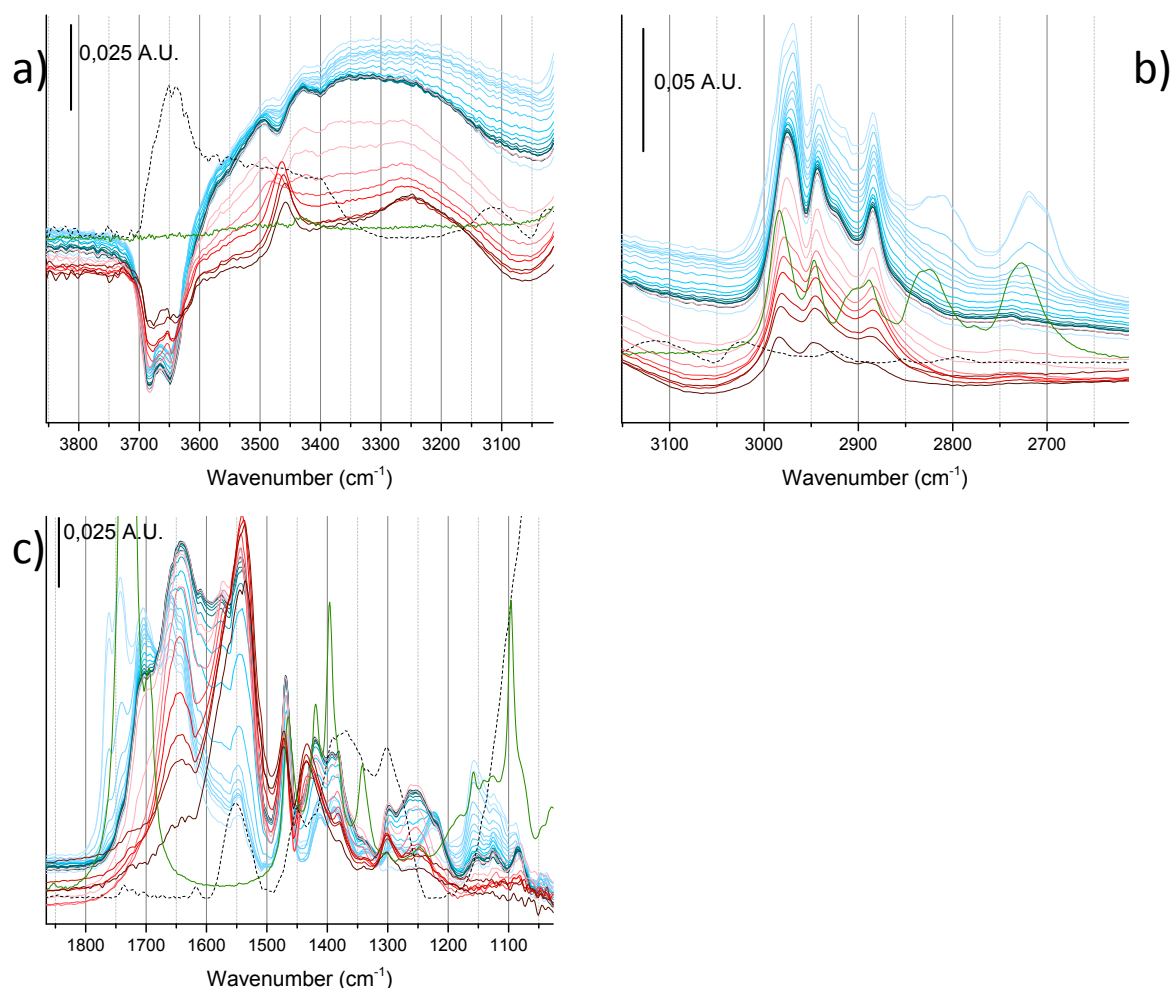

**Figure S4:** DRIFTS spectra of propionaldehyde over  $\text{Ga}_2\text{O}_3$ : a) between 3800 and 3100  $\text{cm}^{-1}$ , b) between 3100 and 2600  $\text{cm}^{-1}$  and c) between 1800 and 1000  $\text{cm}^{-1}$  during propionaldehyde adsorption at 50°C (from azure to blue time elapsed after alcohol pulse); during propionaldehyde desorption (from pink to red spectra recorded each 50°C from 50°C to 450°C); line: green propionaldehyde, dotted pre-treated  $\text{Ga}_2\text{O}_3$ .

The propionaldehyde adsorption following the injection pulse produced a fast erosion of the band at 3658  $\text{cm}^{-1}$  attributable to the OH stretching of surface chemisorbed water on  $\text{Ga}_2\text{O}_3$  (Fig. S2 a). The intensity of all the bands increases reaching a maximum corresponding to duration of the pulse; it subsequently decreases reaching a steady state value. In the 3100 – 2600  $\text{cm}^{-1}$  region (Fig. S2 b), it is possible to notice the presence of the bands at 2974, 2941, 2848, 2825, 2809, 2720  $\text{cm}^{-1}$  attributable

to the CH stretching modes of propanal shifted to lower wavenumber. In the 1800 – 1100  $\text{cm}^{-1}$  region (Fig. S2 c) it is possible to observe a rapid erosion of the band relative to the C=O stretching (1701  $\text{cm}^{-1}$ ) with the concomitant growth of a series of bands at 1642, 1612, 1574, 1544. The disappearance of the band due to the C=O vibration confirm the weak interaction with the  $\text{Ga}_2\text{O}_3$ . Other bands are ascribable to the bending modes of the aldehyde. During desorption it is possible to notice the growth of the band at 3459  $\text{cm}^{-1}$  attributable to the GaO-H stretching produced by the dehydration of propanal to produce propylene (Fig. S2 a). In the 1800 – 1100 region (Fig. S2 c) all the bands gradually disappear except the bands at 1574 and 1544  $\text{cm}^{-1}$ , it is also noticeable the growth of a bands at 1430  $\text{cm}^{-1}$ . These former bands could be attributed to the presence of propanoate specie adsorbed on the catalytic surface.

**Table S3:** Vibrational assignment (cm<sup>-1</sup>) for 2-propanol over Ga<sub>2</sub>O<sub>3</sub>. The labels pre-deH<sub>2</sub> and post-deH<sub>2</sub>O indicate the local minimum before the dehydrogenation TS, and the kinetic product of the dehydration (see Figure 1 for the reaction profile).

| Description                                                                             | Wavenumber (cm <sup>-1</sup> ) |                      |                         |              |      |      |      |
|-----------------------------------------------------------------------------------------|--------------------------------|----------------------|-------------------------|--------------|------|------|------|
|                                                                                         | Calculated                     |                      |                         | Experimental |      |      |      |
|                                                                                         | free                           | Pre-deH <sub>2</sub> | Post-deH <sub>2</sub> O | free         | Ads. | Des. | Flow |
| <b><i>v OH free Ga<sub>2</sub>O<sub>3</sub></i></b>                                     | -                              | -                    | -                       | <b>3658</b>  | -    | -    | -    |
| <i>v OH</i>                                                                             | 3674                           | -                    | -                       | 3340         | 3340 | -    | -    |
| <i>v GaO—H</i>                                                                          | -                              | -                    | 3856                    | -            | -    | 3468 | 3453 |
| <i>v -CO—H—OGa</i>                                                                      | -                              | 3150/<br>2700        | 3424                    | -            | 3232 | 3246 | 3252 |
| <i>v<sub>as</sub> CH<sub>2</sub> + v CH (propylene)</i>                                 | -                              | -                    | 3224                    | -            | -    | -    | 3102 |
| <i>- (propylene)-</i>                                                                   | -                              | -                    | -                       | -            | -    | -    | 3090 |
| <i>v CH + v<sub>as</sub> CH<sub>2</sub> + v<sub>as</sub> CH<sub>3</sub> (propylene)</i> | -                              | -                    | 3160                    | -            | -    | -    | 3080 |
| <i>- (propylene)-</i>                                                                   | -                              | -                    | -                       | -            | -    | -    | 3071 |
| <i>v<sub>as</sub> CH<sub>2</sub> + v CH (propylene)</i>                                 | -                              | -                    | 3133                    | -            | -    | -    | 2989 |
| <i>v<sub>as</sub> CH<sub>3</sub> + v CH (propylene)</i>                                 | -                              | -                    | 3115                    | -            | -    | -    | 2980 |
| <i>v<sub>as</sub> if CH<sub>3</sub> if + v -CO—H—Oga + v CH</i>                         | -                              | 3145                 | -                       | -            | -    | -    | -    |
| <i>v -CO—H—Oga + v<sub>as</sub> if CH<sub>3</sub> of + v CH</i>                         | -                              | 3141                 | -                       | -            | -    | -    | -    |
| <i>v -CO—H—Oga + v<sub>as</sub> if CH<sub>3</sub> of + v CH</i>                         | -                              | 3133                 | -                       | -            | -    | -    | -    |
| <i>v<sub>as</sub> if CH<sub>3</sub> + v CH</i>                                          | 3152                           | -                    | -                       | -            | 2979 | 2979 | -    |
| <i>v<sub>as</sub> if CH<sub>3</sub> + v CH</i>                                          | 3145                           | -                    | -                       | 2969         | 2971 | 2971 | 2969 |
| <i>v<sub>as</sub> if CH<sub>3</sub> + v CH</i>                                          | 3136                           | -                    | -                       | -            | -    | -    | -    |
| <i>v<sub>as</sub> CH<sub>3</sub> (propylene)</i>                                        | -                              | -                    | 3083                    | -            | -    | -    | 2952 |
| <i>v<sub>as</sub> of CH<sub>3</sub> + v CH</i>                                          | 3116                           | -                    | -                       | 2931         | 2933 | 2933 | 2932 |
| <i>v<sub>s</sub> if CH<sub>3</sub> + v CH</i>                                           | 3050                           | 3057                 | -                       | 2917         | 2920 | 2920 | -    |
| <i>- (propylene)-</i>                                                                   | -                              | -                    | -                       | -            | -    | -    | 2917 |
| <i>v<sub>s</sub> if CH<sub>3</sub> + v CH</i>                                           | 3032                           | 3053                 | -                       | -            | -    | -    | -    |
| <i>v CH + v<sub>as</sub> of CH<sub>3</sub></i>                                          | 3013                           | 3040                 | -                       | 2883         | 2887 | 2887 | -    |
| <i>v<sub>s</sub> CH<sub>3</sub> (propylene)</i>                                         | -                              | -                    | 3030                    | -            | -    | -    | 2889 |
| <i>v CH</i>                                                                             | -                              | 2091                 | -                       | -            | 2872 | 2872 | -    |
| <i>- (propylene)-</i>                                                                   | -                              | -                    | -                       | -            | -    | -    | 2868 |
| <i>v C=C + δs CH<sub>2</sub> + δ CH + δs CH<sub>3</sub> (propylene)</i>                 | -                              | -                    | 1688                    | -            | -    | -    | 1841 |
| <i>- (propylene)-</i>                                                                   | -                              | -                    | -                       | -            | -    | -    | 1821 |
| <i>v CO + δs CH<sub>3</sub> (acetone)</i>                                               | -                              | -                    | 1727                    | -            | -    | -    | 1738 |
| <i>ω CH<sub>3</sub> + δs CH<sub>2</sub> (propylene)</i>                                 | -                              | -                    | 1497                    | -            | -    | -    | 1665 |
| <i>ω CH<sub>3</sub> + δs CH<sub>2</sub> (propylene)</i>                                 | -                              | -                    | 1479                    | -            | -    | -    | 1649 |
| <i>δs CH<sub>2</sub> + δ CH + ω CH<sub>3</sub> (propylene)</i>                          | -                              | -                    | 1453                    | -            | -    | -    | 1636 |
| <i>v<sub>as</sub> C-O (hemiacetale)</i>                                                 | -                              | --                   | -                       | -            | -    | 1546 | -    |
| <i>δs CH<sub>3</sub> + δ CH</i>                                                         | 1529                           | -                    | -                       | 1466         | 1468 | 1468 | -    |
| <i>τ CH<sub>3</sub> + τ CH<sub>3</sub> + δ<sub>op</sub> CH + δ CC (propylene)</i>       | -                              | -                    | 1424                    | -            | -    | -    | 1445 |
| <i>v<sub>s</sub> C-O (hemiacetale)</i>                                                  | -                              | -                    | -                       | -            | -    | 1423 | -    |
| <i>δs CH<sub>3</sub> + δ CH + δ OH<sub>ip</sub></i>                                     | 1515                           | 1543                 | -                       | 1407         | 1413 | 1413 | -    |
| <i>δs<sub>if</sub> CH<sub>3</sub> + δ CH + v CC + δ OH<sub>ip</sub></i>                 | 1443                           | 1506                 | -                       | 1378         | 1382 | 1382 | -    |
| <i>δs<sub>if</sub> CH<sub>3</sub> + δ CH + v CC + δ OH<sub>ip</sub></i>                 | 1428                           | 1483                 | -                       | 1369         | 1371 | 1371 | 1370 |
| <i>δs<sub>if</sub> CH<sub>3</sub> + v CC (acetone)</i>                                  | -                              | -                    | 1400                    | -            | -    | -    | 1354 |
| <i>v CC + δ CH + ω CH<sub>3</sub></i>                                                   | 1368                           | 1462                 | -                       | 1340         | 1341 | 1341 | -    |

|                                                                      |      |      |      |      |      |      |      |
|----------------------------------------------------------------------|------|------|------|------|------|------|------|
| $\delta \text{OH}_{\text{ip}} + \rho \text{CH}_3 + \delta \text{CH}$ | 1269 | -    | -    | 1308 | -    | 1308 | -    |
| $\delta \text{CH} + \delta \text{CO-H--OGa} + \omega \text{CH}_3$    | -    | 1312 | -    | -    | 1252 | 1252 | -    |
| $\nu \text{CC} + \delta \text{sCH}_3(\text{acetone bonded})$         | -    | -    | 1284 | -    | -    | -    | 1231 |
| $\nu \text{CC} + \delta \text{sCH}_3(\text{acetone free})$           | -    | -    | 1250 | -    | -    | -    | 1214 |
| $\nu \text{CC} + \delta \text{OH} + \omega \text{CH}_3$              | 1200 | 1283 | -    | 1161 | 1164 | 1164 | 1163 |
| $\delta \text{CH} + \omega \text{CH}_3 + \delta \text{CC}$           | 1156 | 1214 | -    | 1127 | 1132 | 1132 | 1130 |
| $\delta \text{OH}_{\text{ip}} \nu \text{CC} + \omega \text{CH}_3$    | 1092 | 1131 | -    | 1108 | -    | -    | -    |
| $\omega \text{CH}_3 + \delta \text{OH} + \nu \text{CC}$              | 947  | 1120 | -    | 950  | 953  | -    | 948  |
| $\tau \text{CH}_3 + \nu \text{C-OH} + \delta \text{CH}$              | 943  | 1022 | -    | 816  | -    | -    | -    |

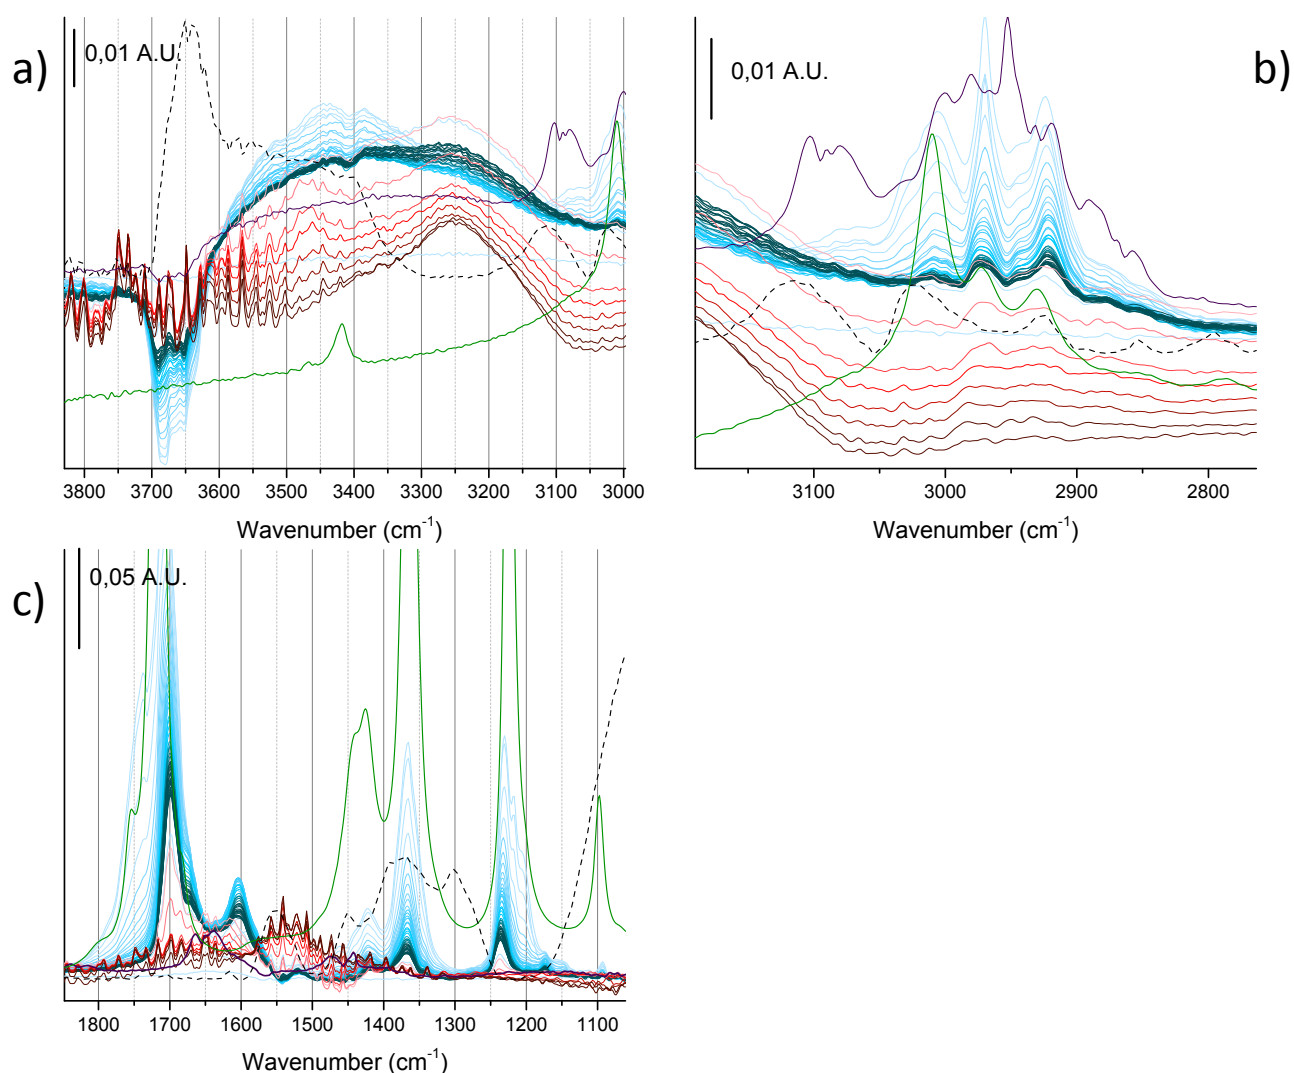

**Figure S5:** DRIFTS spectra of 2-propanone over  $\text{Ga}_2\text{O}_3$ : a) between 3800 and 3000  $\text{cm}^{-1}$ , b) between 3000 and 2800  $\text{cm}^{-1}$  and c) between 1800 and 1100  $\text{cm}^{-1}$  during 2-propanone adsorption at 50°C (from azure to blue time elapsed after alcohol pulse); during 2-propanone desorption (from pink to red spectra recorded each 50°C from 50°C to 450°C); line: green 2-propanone, dotted pre-treated  $\text{Ga}_2\text{O}_3$ .



The acetone adsorption following the injection pulse produced a fast erosion of the band at  $3658\text{ cm}^{-1}$  attributable to the OH stretching of surface chemisorbed water on  $\text{Ga}_2\text{O}_3$  (Fig. S3 a). The intensity of all the bands increases reaching a maximum corresponding to duration of the pulse; it subsequently decreases reaching a steady state value. In all the spectral region (Fig. S3), it is possible to notice the presence of bands relative to the 2-propanone. Increasing temperature, during desorption, all the bands quickly disappear, evidencing the weak interaction of acetone with the catalytic surface. The growth of a pair of low intense and broad bands at  $1544$  and  $1420\text{ cm}^{-1}$  attributable to the hemi-acetale specie was observed.

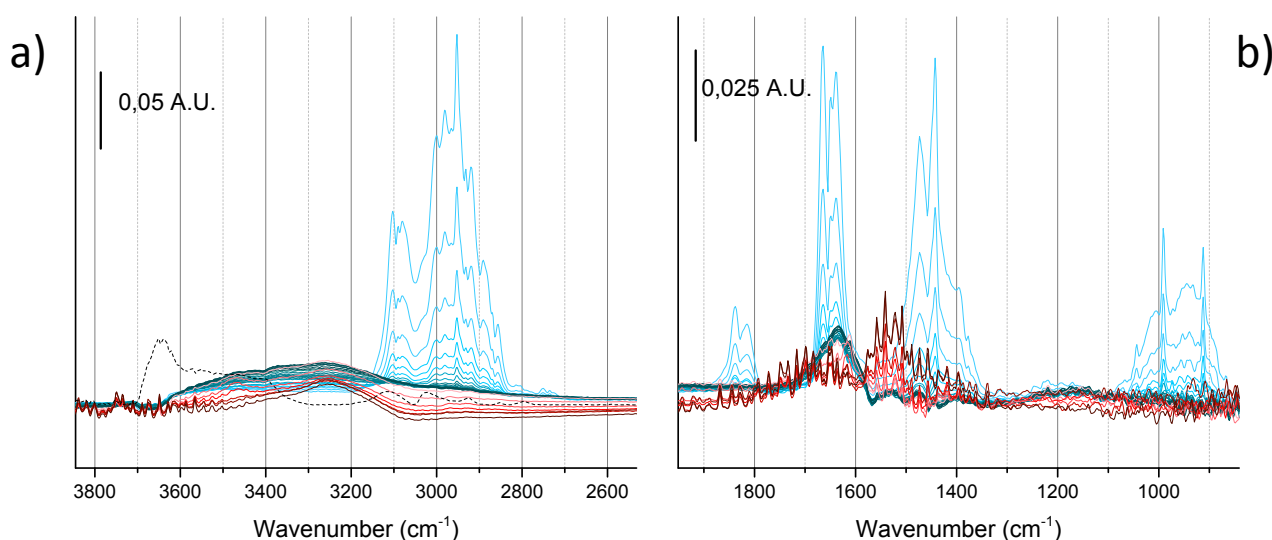

**Figure S6:** DRIFTS spectra of propylene over  $\text{Ga}_2\text{O}_3$ : a) between  $3800$  and  $2600\text{ cm}^{-1}$  and b) between  $1900$  and  $900\text{ cm}^{-1}$  during propylene adsorption at  $50^\circ\text{C}$  (from azure to blue time elapsed after alcohol pulse); during propylene desorption (from pink to red spectra recorded each  $50^\circ\text{C}$  from  $50^\circ\text{C}$  to  $450^\circ\text{C}$ ); line: dotted pre-treated  $\text{Ga}_2\text{O}_3$ .

During the propylene adsorption, the intensity of all bands increases reaching a maximum corresponding to duration of the pulse; it subsequently decreases till completely disappearing.

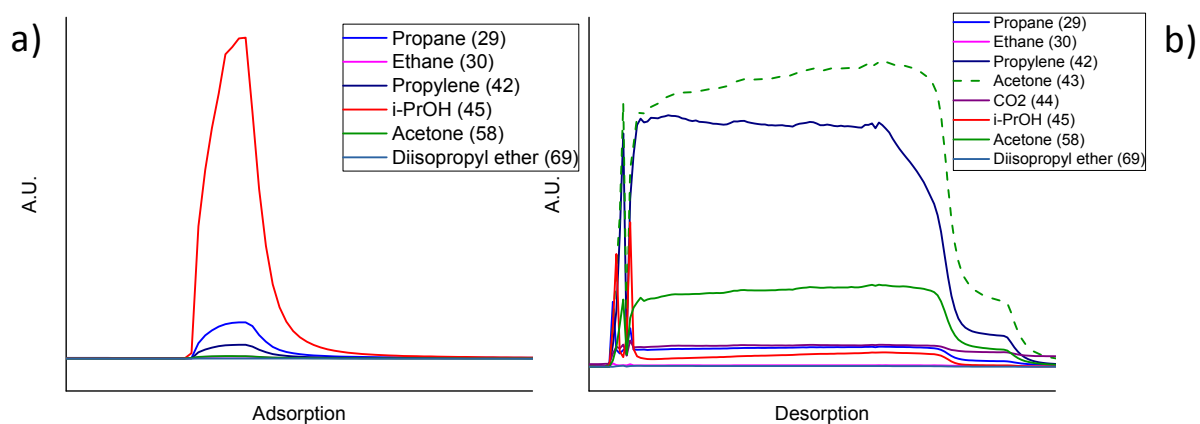

**Figure S7:** On-line MS-spectra recorded during the DRIFTS experiment feeding 2-propanol over gallia: a) pulse; b) desorption.

**Table S4:** relative energetic location of the kinetically relevant stationary points describing the dehydrogenation and dehydration pathways (in kcal/mol) of ethanol over alumina. The zero of the energy scale is set as the energy of the gas-phase alcohol and alumina cluster. Also, shown, there is the barrier difference ( $\Delta\Delta E(\text{TS})$ ) between the TS's of the two reactive channels.

| Alcohol | $\Delta\Delta E(\text{TS})$ ( $E_{\text{deH}_2\text{O}} - E_{\text{deH}_2}$ ) | Dehydration |       | Dehydrogenation |
|---------|-------------------------------------------------------------------------------|-------------|-------|-----------------|
|         |                                                                               | TS          | ads   | TS              |
| ethanol | 8.3                                                                           | -12.7       | -43.7 | -4.3            |

## Benzyl alcohol reactivity over gallia

The reactivity of an aromatic alcohol, for instance 1-phenyl ethanol, may be made non-trivial by the high melting point, which would have forced us to feed them as a solution with a suitable solvent. For this reason, tests were run with only benzyl alcohol (liquid at room temperature and boiling around 205°C) by feeding the liquid reagent in a nitrogen flow over Ga<sub>2</sub>O<sub>3</sub> at 400°C in order to maintain similar conditions as the lighter aliphatic alcohols. In particular, a contact time of 1 second and a %vol of the alcohol of 8% was used for this test. The outlet gaseous stream from the reactor was condensed and recovered in 25 mL of acetonitrile and then analysed by means of a Thermo Focus off-line GC equipped with a FID detector and an Agilent HP-5 capillary column (temperature program: 50 °C for two min, then heating up to 280 °C at 10 °C min<sup>-1</sup>, finally hold for five min). 20 µL of octane were added as internal standard for the quantification of the products. Benzyl alcohol and the main products were calibrated to obtain the corresponding response factor in the appropriate range of concentrations.

The catalytic results are shown in Figure S8.

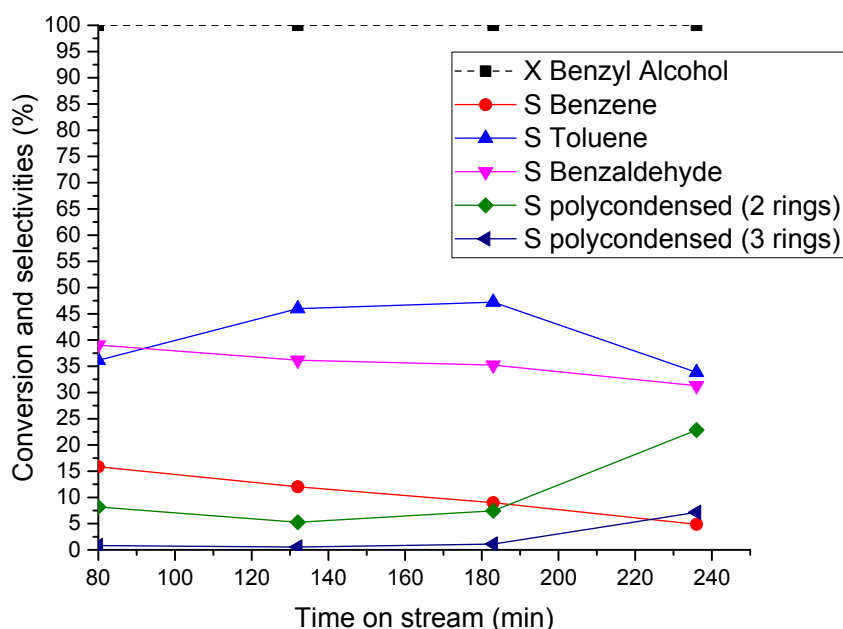

Figure S8: benzyl alcohol decomposition over Ga<sub>2</sub>O<sub>3</sub> at 400°C,  $\tau=1s$ , (molar feed composition benzyl alcohol:N<sub>2</sub>=8:92). Selectivity are calculated as follow:  $S_i=Y_i/\sum Y_i$ .

Interestingly, a complete conversion of the fed benzyl alcohol has been achieved for more than 230 minutes of time on stream. As the dehydration reaction is prevented with this particular alcohol, the main detected products were benzaldehyde, toluene and benzene; a possible reaction pathway is proposed for these in Scheme S1. Noteworthy, a progressive increase of poly-condensated products can be witnessed by increasing the time on stream due to the parasitic benzylation and condensation reactions favored by the presence of acid sites on the catalyst. Moreover, the carbon balance of the reaction is always below 50% and progressively increase during the time on stream. This was attributed to the deposition of heavy carbonaceous residue not only over the catalyst surface (leading to a slow but progressive deactivation of the gallium oxide) but also over the reactor walls.

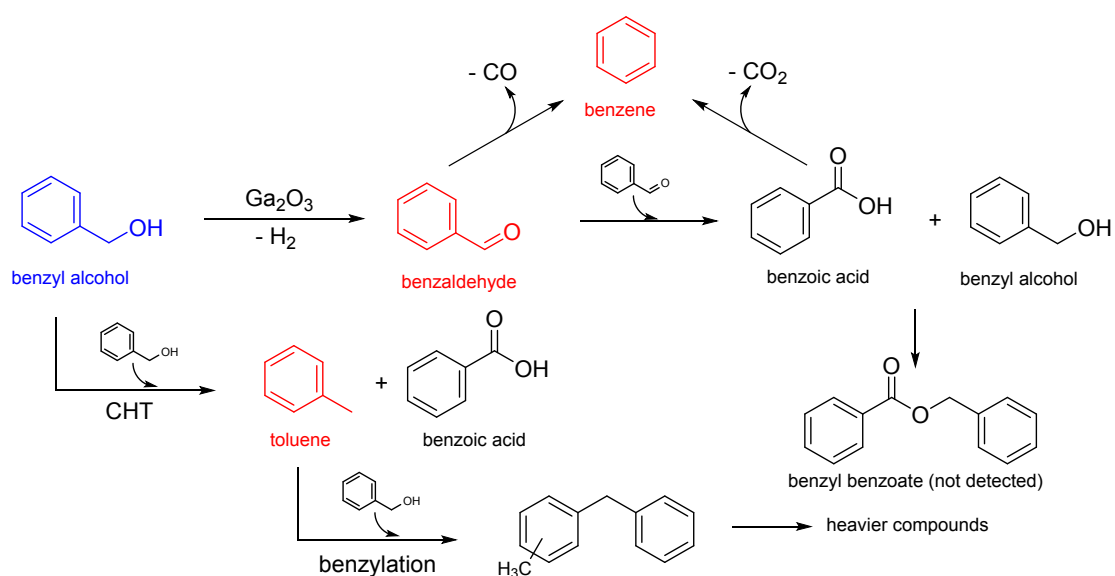

Scheme S1: proposed reaction pathway for the decomposition of benzyl alcohol over Ga<sub>2</sub>O<sub>3</sub> at 400°C. The main products are highlighted in red.
